# Supplementary material
Source: publisher figshare collection journal article supplement (https://frontiersin.figshare.com/ndownloader/files/18539129)
Supplement: Supplementary file [file 18539129]

## Supplementary Material

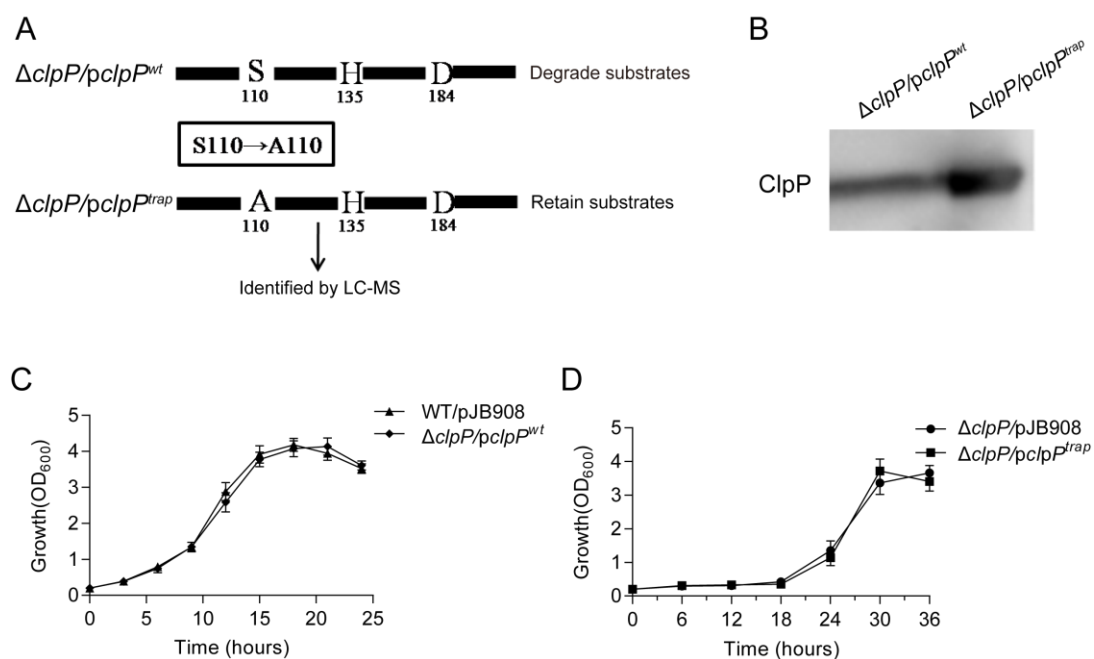

**Supplementary Figure S3. Construction of the ClpP-Trap System successfully.**

(A). Graphical representation of the biological construction of the ClpP-Trap system.

(B). Western blotting was used to detect the expression of ClpP in  $\Delta clpP/pclpP^{wt}$  and  $\Delta clpP/pclpP^{trap}$ .

(C). Growth curve measurement of WT/pJB908 (▲) and  $\Delta clpP/pclpP^{wt}$  (◆).

(D). Growth curve measurement of  $\Delta clpP/pJB908$  (●) and  $\Delta clpP/pclpP^{trap}$  (■).
